# Supplementary material for: High-resolution QTL mapping for grain appearance traits and co-localization of chalkiness-associated differentially expressed candidate genes in rice
Source: PubMed Central journal article supplement (PMC5033801; doi:10.1186/s12284-016-0121-6), 2016-09-22
Supplement: 12284_2016_121_MOESM1_ESM.pdf [file 12284_2016_121_MOESM1_ESM.pdf]

Table S1. Comparison of eight traits between PYZX, P02428 and RILs under four environments in this study.

| Traits                     | PYZX   |       |        |       |        |       |        |       | P02428 |       |        |       |        |       |        |       | RILs   |        |        |       |        |       |        |       |
|----------------------------|--------|-------|--------|-------|--------|-------|--------|-------|--------|-------|--------|-------|--------|-------|--------|-------|--------|--------|--------|-------|--------|-------|--------|-------|
|                            | G-DS   |       | Z-DS   |       | G-WS   |       | Z-WS   |       | G-DS   |       | Z-DS   |       | G-WS   |       | Z-WS   |       | G-DS   |        | Z-DS   |       | G-WS   |       | Z-WS   |       |
|                            | Mean   | S. D. | Mean   | S. D. | Mean   | S. D. | Mean   | S. D. | Mean   | S. D. | Mean   | S. D. | Mean   | S. D. | Mean   | S. D. | Mean   | S. D.  | Mean   | S. D. | Mean   | S. D. | Mean   | S. D. |
| <b>GW (mm)</b>             | 2.233  | 0.015 | 2.263  | 0.015 | 2.227  | 0.025 | 2.320  | 0.010 | 3.790  | 0.056 | 3.720  | 0.079 | 3.653  | 0.042 | 3.853  | 0.076 | 2.765  | 0.019  | 2.752  | 0.020 | 2.638  | 0.020 | 2.701  | 0.020 |
| <b>GL (mm)</b>             | 12.293 | 0.076 | 12.303 | 0.076 | 11.937 | 0.180 | 12.143 | 0.071 | 7.300  | 0.303 | 7.407  | 0.117 | 6.977  | 0.129 | 6.967  | 0.250 | 9.543  | 0.059  | 9.451  | 0.059 | 9.215  | 0.061 | 9.172  | 0.059 |
| <b>LWR</b>                 | 5.503  | 0.015 | 5.437  | 0.015 | 5.360  | 0.062 | 5.233  | 0.047 | 1.927  | 0.086 | 1.990  | 0.056 | 1.623  | 0.488 | 1.807  | 0.100 | 3.491  | 0.038  | 3.439  | 0.039 | 3.541  | 0.041 | 3.473  | 0.037 |
| <b>CS</b>                  | 0.363  | 0.015 | 0.370  | 0.015 | 0.363  | 0.006 | 0.363  | 0.021 | 0.730  | 0.010 | 0.727  | 0.006 | 0.720  | 0.010 | 0.740  | 0.010 | 0.513  | 0.004  | 0.516  | 0.004 | 0.506  | 0.004 | 0.518  | 0.004 |
| <b>AS (mm<sup>2</sup>)</b> | 21.407 | 0.187 | 22.140 | 0.187 | 20.107 | 0.127 | 21.300 | 0.935 | 19.847 | 0.220 | 19.997 | 0.614 | 18.583 | 1.535 | 19.273 | 0.420 | 20.120 | 20.120 | 19.846 | 0.154 | 18.436 | 0.149 | 18.791 | 0.155 |
| <b>PL (mm)</b>             | 27.150 | 0.217 | 27.493 | 0.217 | 26.813 | 0.358 | 27.113 | 0.201 | 19.050 | 0.511 | 19.487 | 0.473 | 18.120 | 0.878 | 17.920 | 0.187 | 22.272 | 0.120  | 22.053 | 0.121 | 21.479 | 0.122 | 21.438 | 0.121 |
| <b>PGWC (%)</b>            | 1.450  | 0.391 | 1.000  | 0.391 | 0.333  | 0.577 | 1.000  | 1.000 | 87.000 | 2.000 | 88.333 | 4.041 | 95.333 | 3.786 | 96.000 | 2.646 | 26.706 | 2.231  | 24.639 | 2.205 | 41.442 | 2.690 | 37.039 | 2.511 |
| <b>DEC</b>                 | 0.14   | 0.08  | 0.09   | 0.08  | 0.04   | 0.07  | 0.08   | 0.08  | 50.60  | 1.13  | 50.50  | 1.85  | 57.20  | 1.25  | 58.33  | 1.05  | 10.16  | 0.89   | 26.10  | 1.04  | 14.64  | 1.19  | 15.36  | 1.27  |

Table S2. Annotation statistics of the SNP between PYZX and P02428.

| Category            |                | Number of SNPs |
|---------------------|----------------|----------------|
| Upstream            |                | 107753         |
| Exonic              | Stop gain      | 725            |
|                     | Stop loss      | 272            |
|                     | Synonymous     | 36076          |
|                     | Non-synonymous | 43509          |
| Intronic            |                | 123531         |
| Splicing            |                | 171            |
| Downstream          |                | 92323          |
| upstream/downstream |                | 17332          |
| Intergenic          |                | 1112344        |
| Total               |                | 1534036        |

Table S3. QTLs detected in the 192 RIL lines derived from the cross between PYZX and P02428 on four environments.

| ID | Trait                               | Environment | Chromosome | Position (cM) | Nearest Left Marker | Nearest Right Marker | LOD    | PVE (%) | Add    |
|----|-------------------------------------|-------------|------------|---------------|---------------------|----------------------|--------|---------|--------|
| 1  | Grain width                         | G-DS        | 1          | 140           | mk157               | mk158                | 4.230  | 9.753   | 0.087  |
| 2  | Grain width                         | G-WS        | 1          | 140           | mk157               | mk158                | 3.889  | 6.346   | 0.069  |
| 3  | Grain width                         | G-DS        | 1          | 209           | mk275               | mk276                | 7.410  | 9.636   | -0.081 |
| 4  | Grain width                         | G-WS        | 1          | 229           | mk289               | mk290                | 4.948  | 7.943   | -0.077 |
| 5  | Grain width                         | Z-WS        | 1          | 232           | mk294               | mk295                | 3.761  | 7.422   | -0.076 |
| 6  | Grain width                         | G-WS        | 3          | 20            | mk575               | mk576                | 3.565  | 5.492   | -0.066 |
| 7  | Grain width                         | Z-DS        | 4          | 111           | mk994               | mk995                | 4.417  | 9.119   | -0.082 |
| 8  | Grain width                         | G-DS        | 5          | 35            | mk1174              | mk1175               | 7.396  | 10.023  | -0.082 |
| 9  | Grain width                         | G-WS        | 5          | 35            | mk1174              | mk1175               | 3.252  | 5.000   | -0.061 |
| 10 | Grain width                         | Z-DS        | 5          | 61            | mk1190              | mk1191               | 5.783  | 12.377  | -0.095 |
| 11 | Grain width                         | G-WS        | 5          | 62            | mk1191              | mk1192               | 5.298  | 10.936  | -0.092 |
| 12 | Grain width                         | G-WS        | 5          | 80            | mk1225              | mk1226               | 2.895  | 4.691   | -0.060 |
| 13 | Grain width                         | G-DS        | 5          | 98            | mk1240              | mk1241               | 2.711  | 3.354   | -0.048 |
| 14 | Grain width                         | G-DS        | 7          | 131           | mk1743              | mk1744               | 9.209  | 12.326  | -0.091 |
| 15 | Grain width                         | G-WS        | 7          | 131           | mk1743              | mk1744               | 6.511  | 10.313  | -0.087 |
| 16 | Grain width                         | G-DS        | 8          | 99            | mk1895              | mk1896               | 4.678  | 6.002   | 0.064  |
| 17 | Grain width                         | Z-WS        | 9          | 100           | mk2073              | mk2074               | 4.459  | 8.899   | 0.082  |
| 18 | Grain length                        | Z-WS        | 2          | 81            | mk380               | mk381                | 3.033  | 5.936   | 0.193  |
| 19 | Grain length                        | Z-DS        | 2          | 90            | mk401               | mk402                | 4.781  | 8.689   | 0.235  |
| 20 | Grain length                        | G-DS        | 2          | 91            | mk404               | mk405                | 4.654  | 6.103   | 0.199  |
| 21 | Grain length                        | Z-WS        | 3          | 152           | mk690               | mk691                | 6.200  | 12.401  | 0.290  |
| 22 | Grain length                        | Z-DS        | 3          | 152           | mk690               | mk691                | 5.856  | 10.967  | 0.276  |
| 23 | Grain length                        | G-DS        | 3          | 153           | mk691               | mk692                | 12.252 | 18.042  | 0.357  |
| 24 | Grain length                        | G-WS        | 3          | 155           | mk693               | mk694                | 12.762 | 20.423  | 0.396  |
| 25 | Grain length                        | Z-DS        | 3          | 244           | mk794               | mk795                | 2.648  | 4.662   | 0.175  |
| 26 | Grain length                        | G-DS        | 3          | 275           | mk819               | mk820                | 3.891  | 5.751   | 0.193  |
| 27 | Grain length                        | G-WS        | 3          | 275           | mk819               | mk820                | 5.690  | 8.828   | 0.244  |
| 28 | Grain length                        | Z-WS        | 3          | 277           | mk821               | mk822                | 2.921  | 5.600   | 0.190  |
| 29 | Grain length                        | G-WS        | 4          | 260           | mk1107              | mk1108               | 4.526  | 6.409   | 0.206  |
| 30 | Grain length                        | G-DS        | 6          | 181           | mk1534              | mk1535               | 2.700  | 3.904   | 0.158  |
| 31 | Grain length                        | G-WS        | 7          | 128           | mk1738              | mk1739               | 11.568 | 17.573  | 0.344  |
| 32 | Grain length                        | G-DS        | 7          | 132           | mk1744              | mk1745               | 13.890 | 20.799  | 0.366  |
| 33 | Grain length                        | G-DS        | 12         | 72            | mk2581              | mk2582               | 2.985  | 4.030   | 0.160  |
| 34 | The ratio of grain length and width | Z-WS        | 1          | 229           | mk289               | mk290                | 3.436  | 6.611   | 0.135  |
| 35 | The ratio of grain length and width | G-DS        | 1          | 230           | mk291               | mk292                | 3.710  | 4.796   | 0.113  |
| 36 | The ratio of grain length and width | Z-DS        | 2          | 90            | mk401               | mk402                | 3.138  | 5.755   | 0.118  |
| 37 | The ratio of grain length and width | G-DS        | 2          | 91            | mk404               | mk405                | 2.765  | 3.540   | 0.096  |
| 38 | The ratio of grain length and width | Z-WS        | 3          | 150           | mk690               | mk691                | 3.598  | 7.283   | 0.147  |

|    |                                     |      |    |     |        |        |        |        |        |
|----|-------------------------------------|------|----|-----|--------|--------|--------|--------|--------|
| 39 | The ratio of grain length and width | Z-DS | 3  | 152 | mk690  | mk691  | 3.789  | 7.239  | 0.139  |
| 40 | The ratio of grain length and width | G-DS | 3  | 155 | mk693  | mk694  | 6.391  | 8.714  | 0.162  |
| 41 | The ratio of grain length and width | G-WS | 3  | 155 | mk693  | mk694  | 7.940  | 12.643 | 0.211  |
| 42 | The ratio of grain length and width | Z-DS | 3  | 219 | mk782  | mk783  | 2.933  | 5.286  | 0.119  |
| 43 | The ratio of grain length and width | G-DS | 3  | 244 | mk794  | mk795  | 3.674  | 4.876  | 0.115  |
| 44 | The ratio of grain length and width | G-DS | 5  | 35  | mk1174 | mk1175 | 6.801  | 9.463  | 0.157  |
| 45 | The ratio of grain length and width | Z-DS | 5  | 64  | mk1196 | mk1197 | 3.379  | 6.191  | 0.123  |
| 46 | The ratio of grain length and width | Z-WS | 5  | 64  | mk1196 | mk1197 | 4.469  | 8.613  | 0.153  |
| 47 | The ratio of grain length and width | Z-DS | 7  | 123 | mk1734 | mk1735 | 4.297  | 8.141  | 0.140  |
| 48 | The ratio of grain length and width | G-DS | 7  | 131 | mk1743 | mk1744 | 13.879 | 20.482 | 0.231  |
| 49 | The ratio of grain length and width | G-WS | 7  | 132 | mk1744 | mk1745 | 14.540 | 24.291 | 0.274  |
| 50 | The ratio of grain length and width | G-WS | 8  | 17  | mk1803 | mk1804 | 4.584  | 6.819  | 0.146  |
| 51 | The ratio of grain length and width | Z-WS | 9  | 100 | mk2073 | mk2074 | 3.427  | 6.598  | -0.133 |
| 52 | The ratio of grain length and width | G-DS | 12 | 39  | mk2541 | mk2542 | 3.437  | 4.403  | 0.111  |
| 53 | Circularity                         | G-WS | 1  | 128 | mk142  | mk143  | 3.705  | 4.346  | 0.013  |
| 54 | Circularity                         | Z-WS | 1  | 231 | mk292  | mk293  | 4.201  | 7.673  | -0.016 |
| 55 | Circularity                         | G-DS | 1  | 232 | mk294  | mk295  | 3.122  | 3.781  | -0.010 |
| 56 | Circularity                         | Z-DS | 2  | 94  | mk414  | mk415  | 3.443  | 5.503  | -0.013 |
| 57 | Circularity                         | Z-WS | 3  | 150 | mk690  | mk691  | 3.518  | 6.736  | -0.016 |
| 58 | Circularity                         | G-DS | 3  | 155 | mk693  | mk694  | 7.256  | 9.370  | -0.018 |
| 59 | Circularity                         | G-WS | 3  | 155 | mk693  | mk694  | 10.251 | 13.834 | -0.024 |
| 60 | Circularity                         | Z-DS | 3  | 158 | mk697  | mk698  | 3.151  | 5.068  | -0.013 |
| 61 | Circularity                         | G-DS | 3  | 244 | mk794  | mk795  | 4.559  | 5.740  | -0.013 |
| 62 | Circularity                         | G-WS | 3  | 244 | mk794  | mk795  | 3.473  | 4.176  | -0.012 |
| 63 | Circularity                         | Z-DS | 4  | 113 | mk999  | mk1000 | 6.313  | 10.189 | -0.018 |
| 64 | Circularity                         | Z-DS | 4  | 205 | mk1039 | mk1040 | 3.382  | 5.308  | 0.013  |
| 65 | Circularity                         | G-DS | 5  | 35  | mk1174 | mk1175 | 8.912  | 11.617 | -0.018 |
| 66 | Circularity                         | G-WS | 5  | 35  | mk1174 | mk1175 | 3.047  | 3.729  | -0.011 |
| 67 | Circularity                         | Z-WS | 5  | 61  | mk1190 | mk1191 | 4.924  | 8.755  | -0.017 |
| 68 | Circularity                         | Z-DS | 5  | 79  | mk1223 | mk1224 | 2.521  | 3.881  | -0.011 |
| 69 | Circularity                         | Z-DS | 6  | 60  | mk1380 | mk1381 | 2.892  | 4.727  | -0.012 |
| 70 | Circularity                         | Z-DS | 7  | 123 | mk1734 | mk1735 | 6.387  | 10.749 | -0.018 |
| 71 | Circularity                         | G-DS | 7  | 131 | mk1743 | mk1744 | 16.025 | 22.466 | -0.025 |
| 72 | Circularity                         | G-WS | 7  | 131 | mk1743 | mk1744 | 18.346 | 26.139 | -0.030 |
| 73 | Circularity                         | Z-WS | 7  | 134 | mk1746 | mk1747 | 3.610  | 6.532  | -0.015 |
| 74 | Circularity                         | G-WS | 8  | 17  | mk1803 | mk1804 | 2.875  | 3.403  | -0.011 |
| 75 | Circularity                         | Z-DS | 9  | 98  | mk2072 | mk2073 | 2.524  | 3.592  | 0.010  |
| 76 | Circularity                         | G-DS | 12 | 39  | mk2541 | mk2542 | 4.395  | 5.274  | -0.013 |
| 77 | Area size of grain                  | G-DS | 3  | 12  | mk565  | mk566  | 2.524  | 3.302  | 0.364  |
| 78 | Area size of grain                  | G-WS | 3  | 62  | mk608  | mk609  | 4.049  | 7.492  | -0.551 |
| 79 | Area size of grain                  | Z-DS | 3  | 137 | mk686  | mk687  | 3.161  | 7.228  | 0.556  |
| 80 | Area size of grain                  | Z-WS | 3  | 138 | mk686  | mk687  | 3.883  | 7.981  | 0.586  |

|     |                                     |      |    |     |        |        |        |        |         |
|-----|-------------------------------------|------|----|-----|--------|--------|--------|--------|---------|
| 81  | Area size of grain                  | G-WS | 3  | 139 | mk688  | mk689  | 8.125  | 16.135 | 0.806   |
| 82  | Area size of grain                  | G-DS | 3  | 140 | mk689  | mk690  | 10.032 | 14.595 | 0.757   |
| 83  | Area size of grain                  | G-WS | 4  | 2   | mk868  | mk869  | 2.616  | 5.040  | -0.472  |
| 84  | Area size of grain                  | G-DS | 4  | 134 | mk1003 | mk1004 | 6.332  | 8.670  | -0.598  |
| 85  | Area size of grain                  | Z-DS | 5  | 62  | mk1191 | mk1192 | 2.686  | 6.388  | -0.530  |
| 86  | Area size of grain                  | G-DS | 5  | 70  | mk1207 | mk1208 | 4.387  | 5.971  | -0.498  |
| 87  | Area size of grain                  | Z-WS | 5  | 101 | mk1241 | mk1242 | 4.619  | 10.546 | -0.675  |
| 88  | Area size of grain                  | Z-WS | 5  | 135 | mk1262 | mk1263 | 4.081  | 8.842  | 0.620   |
| 89  | Area size of grain                  | G-DS | 6  | 178 | mk1532 | mk1533 | 3.534  | 4.876  | 0.439   |
| 90  | Area size of grain                  | G-DS | 7  | 21  | mk1578 | mk1579 | 6.167  | 8.879  | 0.639   |
| 91  | Area size of grain                  | G-DS | 10 | 75  | mk2261 | mk2262 | 7.044  | 10.657 | 0.651   |
| 92  | Area size of grain                  | G-DS | 11 | 213 | mk2510 | mk2511 | 4.149  | 5.861  | 0.481   |
|     |                                     |      |    |     |        |        |        |        |         |
| 93  | Perimeter length of grain           | G-WS | 2  | 53  | mk349  | mk350  | 2.606  | 3.289  | 0.301   |
| 94  | Perimeter length of grain           | Z-WS | 2  | 81  | mk380  | mk381  | 2.922  | 5.700  | 0.388   |
| 95  | Perimeter length of grain           | G-DS | 2  | 90  | mk401  | mk402  | 4.330  | 6.003  | 0.399   |
| 96  | Perimeter length of grain           | Z-DS | 2  | 90  | mk401  | mk402  | 4.789  | 8.674  | 0.480   |
| 97  | Perimeter length of grain           | Z-DS | 3  | 149 | mk689  | mk690  | 6.179  | 11.464 | 0.563   |
| 98  | Perimeter length of grain           | Z-WS | 3  | 152 | mk690  | mk691  | 6.379  | 12.763 | 0.604   |
| 99  | Perimeter length of grain           | G-DS | 3  | 153 | mk691  | mk692  | 12.449 | 18.648 | 0.737   |
| 100 | Perimeter length of grain           | G-WS | 3  | 155 | mk693  | mk694  | 14.296 | 21.024 | 0.813   |
| 101 | Perimeter length of grain           | G-WS | 3  | 244 | mk794  | mk795  | 5.079  | 6.469  | 0.430   |
| 102 | Perimeter length of grain           | G-DS | 3  | 275 | mk819  | mk820  | 3.743  | 5.557  | 0.385   |
| 103 | Perimeter length of grain           | Z-WS | 3  | 277 | mk821  | mk822  | 2.956  | 5.665  | 0.392   |
| 104 | Perimeter length of grain           | G-DS | 4  | 215 | mk1044 | mk1045 | 2.515  | 3.484  | -0.304  |
| 105 | Perimeter length of grain           | G-WS | 4  | 263 | mk1110 | mk1111 | 4.082  | 5.110  | 0.373   |
| 106 | Perimeter length of grain           | G-DS | 6  | 181 | mk1534 | mk1535 | 3.140  | 4.608  | 0.348   |
| 107 | Perimeter length of grain           | G-WS | 7  | 128 | mk1738 | mk1739 | 9.319  | 12.409 | 0.584   |
| 108 | Perimeter length of grain           | G-DS | 7  | 133 | mk1745 | mk1746 | 12.403 | 18.442 | 0.701   |
| 109 | Perimeter length of grain           | G-WS | 10 | 74  | mk2261 | mk2262 | 3.290  | 4.021  | 0.333   |
| 110 | Perimeter length of grain           | G-DS | 12 | 72  | mk2581 | mk2582 | 2.726  | 3.710  | 0.312   |
|     |                                     |      |    |     |        |        |        |        |         |
| 111 | Percentage of grain with chalkiness | Z-DS | 2  | 168 | mk473  | mk474  | 3.165  | 5.594  | -7.291  |
| 112 | Percentage of grain with chalkiness | Z-DS | 4  | 113 | mk999  | mk1000 | 7.035  | 12.975 | -10.997 |
| 113 | Percentage of grain with chalkiness | G-DS | 4  | 135 | mk1005 | mk1006 | 5.635  | 9.738  | -9.579  |
| 114 | Percentage of grain with chalkiness | G-WS | 5  | 13  | mk1154 | mk1155 | 2.638  | 4.971  | -8.125  |
| 115 | Percentage of grain with chalkiness | G-DS | 5  | 35  | mk1174 | mk1175 | 5.250  | 8.985  | -8.999  |
| 116 | Percentage of grain with chalkiness | Z-DS | 5  | 60  | mk1189 | mk1190 | 6.347  | 11.890 | -10.337 |
| 117 | Percentage of grain with chalkiness | G-WS | 5  | 60  | mk1189 | mk1190 | 4.007  | 8.143  | -9.706  |
| 118 | Percentage of grain with chalkiness | G-WS | 5  | 84  | mk1228 | mk1229 | 2.773  | 5.182  | -8.332  |
| 119 | Percentage of grain with chalkiness | G-WS | 6  | 55  | mk1378 | mk1379 | 3.002  | 5.819  | -8.807  |
| 120 | Percentage of grain with chalkiness | Z-DS | 6  | 78  | mk1408 | mk1409 | 2.568  | 4.457  | -6.255  |
| 121 | Percentage of grain with chalkiness | Z-DS | 7  | 132 | mk1744 | mk1745 | 3.662  | 7.123  | -7.934  |
| 122 | Percentage of grain with chalkiness | G-DS | 7  | 134 | mk1746 | mk1747 | 2.946  | 4.763  | -6.593  |

|     |                                     |      |   |     |        |        |       |        |         |
|-----|-------------------------------------|------|---|-----|--------|--------|-------|--------|---------|
| 123 | Percentage of grain with chalkiness | Z-WS | 8 | 1   | mk1787 | mk1788 | 4.804 | 9.866  | -10.693 |
| 124 | Percentage of grain with chalkiness | G-DS | 8 | 4   | mk1790 | mk1791 | 4.076 | 6.701  | -7.893  |
| 125 | Percentage of grain with chalkiness | G-WS | 8 | 17  | mk1803 | mk1804 | 4.580 | 8.645  | -10.740 |
| 126 | Percentage of grain with chalkiness | Z-WS | 9 | 108 | mk2078 | mk2079 | 2.642 | 5.430  | -7.888  |
|     |                                     |      |   |     |        |        |       |        |         |
| 127 | Degree of endosperm chalkiness      | Z-WS | 4 | 110 | mk991  | mk992  | 3.016 | 6.342  | -3.745  |
| 128 | Degree of endosperm chalkiness      | G-DS | 4 | 136 | mk1006 | mk1007 | 3.779 | 7.760  | -2.188  |
| 129 | Degree of endosperm chalkiness      | G-WS | 5 | 18  | mk1160 | mk1161 | 3.589 | 5.831  | -4.473  |
| 130 | Degree of endosperm chalkiness      | G-DS | 5 | 35  | mk1174 | mk1175 | 3.354 | 6.847  | -2.014  |
| 131 | Degree of endosperm chalkiness      | Z-DS | 5 | 60  | mk1189 | mk1190 | 3.660 | 8.462  | -1.813  |
| 132 | Degree of endosperm chalkiness      | G-WS | 5 | 61  | mk1190 | mk1191 | 3.516 | 7.464  | -4.003  |
| 133 | Degree of endosperm chalkiness      | Z-WS | 6 | 23  | mk1339 | mk1340 | 2.516 | 5.391  | -3.390  |
| 134 | Degree of endosperm chalkiness      | G-WS | 6 | 64  | mk1387 | mk1388 | 7.378 | 12.779 | -6.611  |
| 135 | Degree of endosperm chalkiness      | G-WS | 8 | 6   | mk1792 | mk1793 | 6.002 | 10.074 | -5.931  |
| 136 | Degree of endosperm chalkiness      | G-DS | 8 | 130 | mk1924 | mk1925 | 3.411 | 7.027  | -2.046  |

Table S6. Details of PGWC and DEC parameters of the L-Pool and H-Pool.

|        | lines | PGWC (%) | DEC   |
|--------|-------|----------|-------|
| L-Pool | GL25  | 4.05     | 1.30  |
|        | GL40  | 4.07     | 0.60  |
|        | GL48  | 2.13     | 1.60  |
|        | GL57  | 2.19     | 0.20  |
|        | GL73  | 4.06     | 2.90  |
|        | GL97  | 1.20     | 1.90  |
|        | GL104 | 8.21     | 1.51  |
|        | GL108 | 3.07     | 1.20  |
|        | GL109 | 0.00     | 0.00  |
|        | GL117 | 2.01     | 0.00  |
|        | GL167 | 5.19     | 1.50  |
|        | GL168 | 4.31     | 0.00  |
|        | GL169 | 7.19     | 3.10  |
| H-Pool | GL19  | 100.00   | 97.30 |
|        | GL32  | 100.00   | 99.20 |
|        | GL47  | 100.00   | 96.40 |
|        | GL81  | 98.02    | 95.80 |
|        | GL82  | 98.12    | 97.70 |
|        | GL110 | 100.00   | 95.30 |
|        | GL134 | 100.00   | 98.60 |
|        | GL139 | 99.21    | 97.00 |
|        | GL141 | 99.02    | 97.90 |
|        | GL144 | 99.03    | 89.60 |
|        | GL150 | 100.00   | 99.30 |
|        | GL156 | 100.00   | 98.50 |
|        | GL162 | 98.17    | 98.00 |

Table S7. Primers used for qRT-PCR.

| <b>Gene ID</b>         | <b>Forward Sequence</b>  | <b>Reverse Sequence</b> | <b>Product Size (bp)</b> |
|------------------------|--------------------------|-------------------------|--------------------------|
| <i>Os05t0214300-00</i> | ATGGTTTTCTGTGGTGAGC      | GATGCCATCAGCATGACTTG    | 148                      |
| <i>Os05t0215300-01</i> | GATGAATGCAGCAATGATGG     | GAGTTCACCAATCCGCATCT    | 147                      |
| <i>Os07t0604800-01</i> | TACATCTGGCACAGCAAAGC     | CTTGGCCAGCTCAAGGTAAC    | 156                      |
| <i>Os08t0111200-01</i> | TCACCGTTCATTCCTCACAA     | TCCCGGTCAGTTCAGATTTT    | 151                      |
| <i>Os08t0120600-01</i> | GCCTACTGCGGCAAGTACA      | CGGTTCTCCTCGACATTCTC    | 149                      |
| <i>Acting</i>          | CCCTCCTGAAAGGAAGTACAGTGT | GTCCGAAGAATTAGAAGCATTTC | 146                      |
